# Supplementary material
Source: PubMed Central journal article supplement (PMC4187984)
Supplement: AAC.01826-13_zac010143291so1.pdf [file AAC.01826-13_zac010143291so1.pdf]

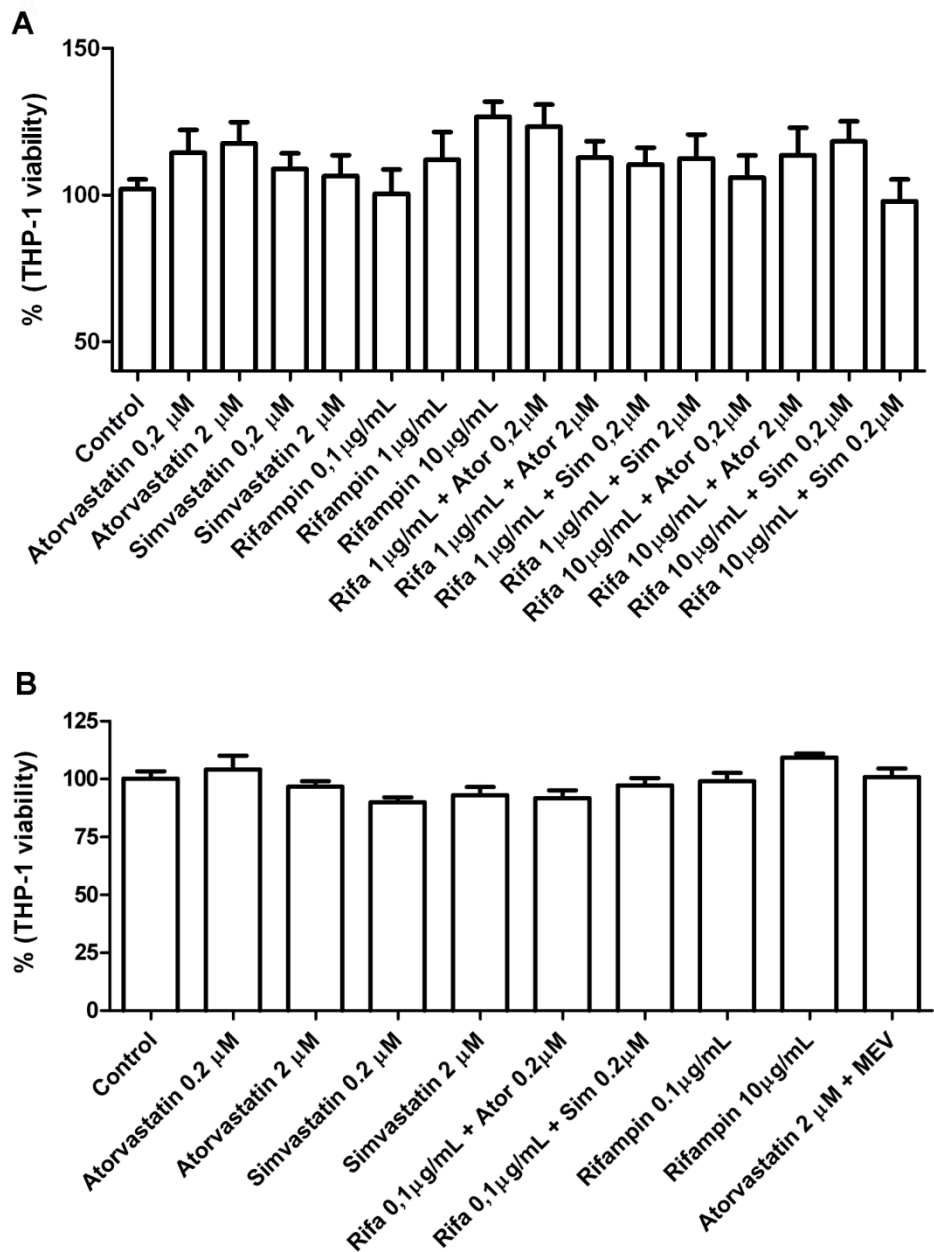

Figure 1 supplementary) **THP-1 cytotoxic measurement by MTT reduction after statins treatment.**

Thiazolyl blue tetrazolium bromide (MTT) reduction was used as a cellular viability parameter to compare all treatment regimes used along the present work. THP1 cells were seeded on 96-well plates at a density of  $5 \times 10^4$  cells /well and incubated in the presence or absence of statins at varying concentrations during 72 h (A) or 1 week (B). After incubation, MTT (Sigma) solution was added to each well and the plates were incubated in the dark for 4 h at 37 °C. No significant differences were observed after treatment in the four normalized independent biological replicate experiments.

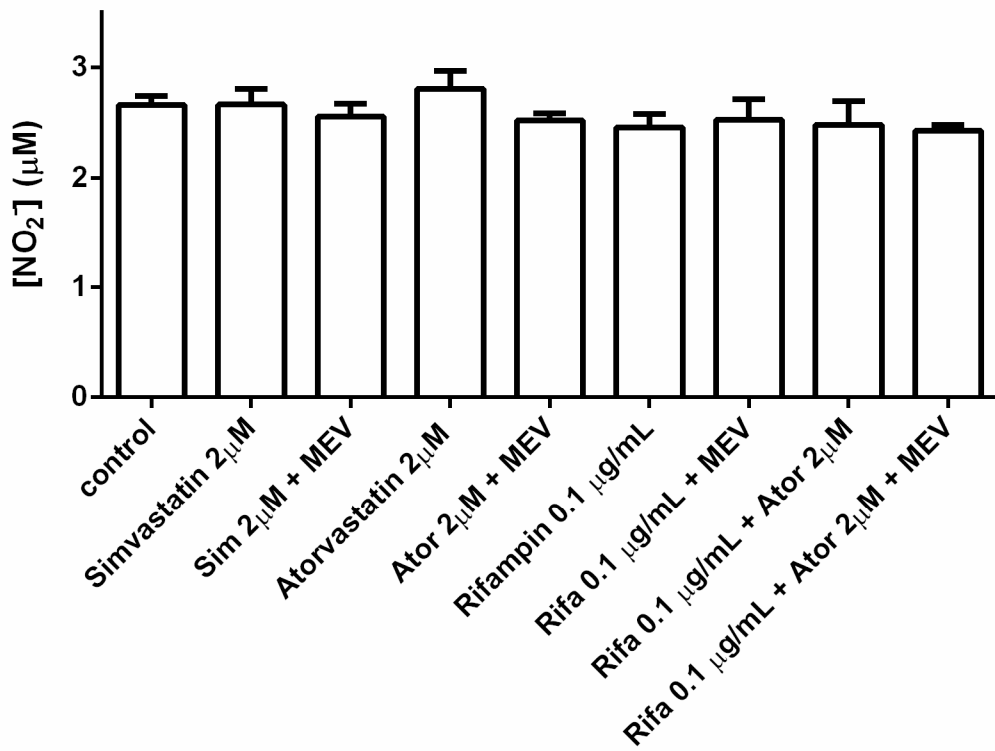

Figure 2 supplementary) **Statins do not increase NO production in THP-1 cells.**

The nitric oxide was measured from culture supernatants of THP-1 macrophages infected with *M. leprae* and concomitantly exposed to the different treatments during 24 hours. The formation of sodium nitrite (NaNO<sub>2</sub>) in the supernatant was detected by following absorbance of the Griess reagent (Sigma) at 570 nm.
